# Supplementary material for: Clinical and Microbiological Risk Factors for 30-Day Mortality of Bloodstream Infections Caused by OXA-48-Producing Klebsiella pneumoniae
Source: MDPI journal article supplement (doi:10.3390/pathogens13010011), 2023-12-21
Supplement: s1 [file s1]

## Article

# Clinical and Microbiological Risk Factors for 30-Day Mortality of Bloodstream Infections Caused by OXA-48-Producing *Klebsiella pneumoniae*

Pilar Lumbreras-Iglesias <sup>1,2,3</sup>, Edurne Rodrigo-Arazola <sup>2</sup>, Lucía López-Amor <sup>4</sup>, Jonathan Fernández-Suárez <sup>1,2</sup>, María Rosario Rodicio <sup>1,5,\*</sup> and Javier Fernández <sup>1,2,5,6,7,\*</sup> †

<sup>1</sup> Traslational Microbiology Group, Health Research Institute of the Principality of Asturias (ISPA), 33011 Oviedo, Spain; uo231178@uniovi.es (P.L.-I.); jhonatan.fernandez@sespa.es (J.F.-S.)

<sup>2</sup> Department of Clinical Microbiology, Central University Hospital of Asturias (HUCA), 33011 Oviedo, Spain; edurnearrazola@gmail.com

<sup>3</sup> Hematological malignancies Group, Health Research Institute of the Principality of Asturias (ISPA), 33011 Oviedo, Spain;

<sup>4</sup> Department of Intensive Care Medicine, San Agustín University Hospital (HUSA), 33401 Avilés, Spain; lucia.lopez@sespa.es

<sup>5</sup> Department of Functional Biology, Microbiology Area, University of Oviedo, 33006 Oviedo, Spain

<sup>6</sup> Research & Innovation, Artificial Intelligence and Statistical Department, Pragmatech AI Solutions, 33001 Oviedo, Spain

<sup>7</sup> Biomedical Research Networking Center - Respiratory diseases, 28029 Madrid, Spain

\* Correspondence: rrodicio@uniovi.es (M.R.R.); fernandezdjavier@uniovi.es (J.F.)

† These authors contributed equally to this work.

**Table S1:** Administering therapy to patients and molecular features of *bla*<sub>OXA-48</sub>-carrying *Klebsiella* spp. isolates recovered from blood cultures in a Spanish hospital from 2014 to 2019.

| Isolate       | Resistance genes                                                                                                                                                                                                                                                                                                                                                                     | Antimicrobial resistance                                                   | Antimicrobial therapy           |
|---------------|--------------------------------------------------------------------------------------------------------------------------------------------------------------------------------------------------------------------------------------------------------------------------------------------------------------------------------------------------------------------------------------|----------------------------------------------------------------------------|---------------------------------|
| Kp_HUCA_Bac_1 | <i>bla</i> <sub>OXA-1</sub> , <i>bla</i> <sub>OXA-48</sub> , <i>bla</i> <sub>SHV-28</sub> , <i>aac</i> (6')-Ib-cr, <i>oqx</i> A, <i>oqx</i> B, <i>fos</i> A6, <i>aad</i> A2, <i>aph</i> (3')-Ia, <i>sul</i> 1, <i>mph</i> (A), <i>dfr</i> A12, <i>cat</i> B3                                                                                                                         | AMP, AMC, P/T, ERT, CIP, SXT, TB, CST                                      | Meropenem + Tigecycline         |
| Kp_HUCA_Bac_2 | <i>bla</i> <sub>CTX-M-15</sub> , <i>bla</i> <sub>OXA-1</sub> , <i>bla</i> <sub>OXA-48</sub> , <i>bla</i> <sub>OXA-9</sub> , <i>bla</i> <sub>SHV-71</sub> , <i>bla</i> <sub>TEM-1A</sub> , <i>oqx</i> A, <i>oqx</i> B, <i>fos</i> A, <i>aac</i> (3)-IIa, <i>aac</i> (6')-Ib, <i>aac</i> (6')-Ib-cr, <i>aac</i> (6')-Ib3, <i>aad</i> A1, <i>drf</i> A14, <i>cat</i> B3, <i>tet</i> (D) | AMP, AMC, P/T, CTX, FEP, ERT, SXT, GM, TB                                  | Meropenem + Amikacin            |
| Kp_HUCA_Bac_3 | <i>bla</i> <sub>CTX-M-15</sub> , <i>bla</i> <sub>OXA-1</sub> , <i>bla</i> <sub>OXA-48</sub> , <i>bla</i> <sub>SHV-28</sub> , <i>bla</i> <sub>TEM-1B</sub> , <i>aac</i> (6')-Ib-cr, <i>oqx</i> A, <i>oqx</i> B, <i>fos</i> A6, <i>aad</i> A2, <i>aph</i> (3')-Ia, <i>sul</i> 1, <i>mph</i> (A), <i>dfr</i> A12, <i>cat</i> B3                                                         | AMP, AMC, P/T, CTX, FEP, ERT, CIP, SXT, TB, CST                            | Imipenem + Gentamicin + Septrin |
| Kp_HUCA_Bac_4 | <i>bla</i> <sub>CTX-M-15</sub> , <i>bla</i> <sub>OXA-1</sub> , <i>bla</i> <sub>OXA-48</sub> , <i>bla</i> <sub>OXA-9</sub> , <i>bla</i> <sub>SHV-71</sub> , <i>bla</i> <sub>TEM-1A</sub> , <i>oqx</i> A, <i>oqx</i> B, <i>fos</i> A, <i>aac</i> (3)-IIa, <i>aac</i> (6')-Ib3, <i>aad</i> A1, <i>dfr</i> A14, <i>cat</i> B3, <i>tet</i> (D)                                            | AMP, AMC, P/T, CTX, FEP, ERT, TB, CST                                      | Meropenem                       |
| Kp_HUCA_Bac_5 | <i>bla</i> <sub>CTX-M-15</sub> , <i>bla</i> <sub>OXA-1</sub> , <i>bla</i> <sub>OXA-48</sub> , <i>bla</i> <sub>OXA-9</sub> , <i>bla</i> <sub>SHV-28</sub> , <i>bla</i> <sub>TEM-1A</sub> , <i>oqx</i> A, <i>oqx</i> B, <i>fos</i> A6, <i>aac</i> (3)-IIa, <i>aac</i> (6')-Ib3, <i>aad</i> A1, <i>dfr</i> A14, <i>cat</i> B3                                                           | AMP, AMC, P/T, FOX, CTX, FEP, ERT, IMP, MER, CIP, SXT, GM, TB, AK, FF, TIG | Colistin                        |
| Kp_HUCA_Bac_6 | <i>bla</i> <sub>CTX-M-15</sub> , <i>bla</i> <sub>OXA-1</sub> , <i>bla</i> <sub>OXA-48</sub> , <i>bla</i> <sub>OXA-9</sub> , <i>bla</i> <sub>SHV-28</sub> ,                                                                                                                                                                                                                           | AMP, AMC, P/T, CTX,                                                        | Meropenem +                     |

|                |                                                                                                                                                                                                                                                                                                                                                                   |                                                                   |                                    |
|----------------|-------------------------------------------------------------------------------------------------------------------------------------------------------------------------------------------------------------------------------------------------------------------------------------------------------------------------------------------------------------------|-------------------------------------------------------------------|------------------------------------|
|                | <i>bla</i> <sub>TEM-1A</sub> , <i>oqx</i> A, <i>oqx</i> B, <i>fos</i> A6, <i>aac</i> (6')-Ib3, <i>aad</i> A1, <i>dfr</i> A14, <i>cat</i> B3                                                                                                                                                                                                                       | FEP, ERT, CIP, SXT, TB, FF                                        | Piperacillin/Tazobactam + Amikacin |
| Kp_HUCA_Bac_7  | <i>bla</i> <sub>CTX-M-15</sub> , <i>bla</i> <sub>OXA-1</sub> , <i>bla</i> <sub>OXA-48</sub> , <i>bla</i> <sub>OXA-9</sub> , <i>bla</i> <sub>SHV-28</sub> , <i>bla</i> <sub>TEM-1A</sub> , <i>aac</i> (6')-Ib-cr, <i>oqx</i> A, <i>oqx</i> B, <i>fos</i> A6, <i>aac</i> (3)-IIa, <i>aac</i> (6')-Ib, <i>aad</i> A1, <i>dfr</i> A14, <i>cat</i> B3, <i>tet</i> (D)  | AMP, AMC, P/T, FOX, FEP, ERT, IMP, MER, CIP, SXT, GM, TB, FF      | Meropenem + Amikacin + Tigecycline |
| Kp_HUCA_Bac_8  | <i>bla</i> <sub>CTX-M-15</sub> , <i>bla</i> <sub>OXA-1</sub> , <i>bla</i> <sub>OXA-48</sub> , <i>bla</i> <sub>OXA-9</sub> , <i>bla</i> <sub>SHV-1</sub> , <i>bla</i> <sub>TEM1A</sub> , <i>aac</i> (6')-Ib-cr, <i>oqx</i> A, <i>oqx</i> B, <i>fos</i> A6, <i>aac</i> (6')-Ib, <i>aac</i> (6')-Ib3, <i>aad</i> A1, <i>cat</i> B3, <i>tet</i> (D)                   | AMP, AMC, P/T, CTX, FEP, ERT, CIP, TB                             | Amikacin + Imipenem + Colistin     |
| Kp_HUCA_Bac_9  | <i>bla</i> <sub>CTX-M-15</sub> , <i>bla</i> <sub>OXA-1</sub> , <i>bla</i> <sub>OXA-48</sub> , <i>bla</i> <sub>OXA-9</sub> , <i>bla</i> <sub>SHV-28</sub> , <i>bla</i> <sub>TEM-1A</sub> , <i>oqx</i> A, <i>oqx</i> B, <i>fos</i> A6, <i>aac</i> (6')-Ib3, <i>aad</i> A1, <i>dfr</i> A14, <i>cat</i> B3                                                            | AMP, AMC, P/T, CTX, FEP, ERT, CIP, SXT, TB, FF                    | Meropenem + Colistin               |
| Kp_HUCA_Bac_10 | <i>bla</i> <sub>CTX-M-15</sub> , <i>bla</i> <sub>OXA-1</sub> , <i>bla</i> <sub>OXA-48</sub> , <i>bla</i> <sub>OXA-9</sub> , <i>bla</i> <sub>SHV-28</sub> , <i>bla</i> <sub>TEM-1A</sub> , <i>aac</i> (6')-Ib-cr, <i>oqx</i> A, <i>oqx</i> B, <i>fos</i> A6, <i>aac</i> (3)-IIa, <i>aac</i> (6')-Ib, <i>aad</i> A1, <i>dfr</i> A14, <i>cat</i> B3, <i>tet</i> (D)  | AMP, AMC, P/T, FOX, CTX, FEP, ERT, IMP, MER, CIP, SXT, TB, FF     | Meropenem                          |
| Kp_HUCA_Bac_11 | <i>bla</i> <sub>OXA-48</sub> , <i>bla</i> <sub>SHV-12</sub> , <i>bla</i> <sub>TEM-1B</sub> , <i>oqx</i> A, <i>oqx</i> B, <i>qnr</i> B1, <i>fos</i> A, <i>aac</i> (3)-IIId, <i>aph</i> (3'')-Ib, <i>aph</i> (6)-Id, <i>sul</i> 2, <i>dfr</i> A14, <i>cat</i> A2, <i>tet</i> (A), <i>tet</i> (D)                                                                    | AMP, AMC, P/T, CTX, FEP, ERT, CIP, SXT, GM                        | Colistin + Amikacin                |
| Kp_HUCA_Bac_13 | <i>bla</i> <sub>CTX-M-15</sub> , <i>bla</i> <sub>OXA-1</sub> , <i>bla</i> <sub>OXA-48</sub> , <i>bla</i> <sub>OXA-9</sub> , <i>bla</i> <sub>SHV-28</sub> , <i>bla</i> <sub>TEM-1A</sub> , <i>oqx</i> A, <i>oqx</i> B, <i>fos</i> A6, <i>aac</i> (6')-Ib3, <i>aad</i> A1, <i>dfr</i> A14, <i>cat</i> B3, <i>tet</i> (D)                                            | AMP, AMC, P/T, FOX, CTX, FEP, ERT, IMP, MER, CIP, SXT, TB, AK, FF | Colistin                           |
| Kp_HUCA_Bac_15 | <i>bla</i> <sub>OXA-48</sub> , <i>bla</i> <sub>SHV-12</sub> , <i>bla</i> <sub>TEM-1B</sub> , <i>oqx</i> A, <i>oqx</i> B, <i>qnr</i> B1, <i>fos</i> A, <i>aac</i> (3)-IIId, <i>aph</i> (3'')-Ib, <i>aph</i> (6)-Id, <i>sul</i> 2, <i>dfr</i> A14, <i>cat</i> A2, <i>tet</i> (A), <i>tet</i> (D)                                                                    | AMP, AMC, P/T, CTX, FEP, ERT, CIP, SXT, GM                        | Colistin                           |
| Kp_HUCA_Bac_16 | <i>bla</i> <sub>CTX-M-15</sub> , <i>bla</i> <sub>OXA-1</sub> , <i>bla</i> <sub>OXA-48</sub> , <i>bla</i> <sub>OXA-9</sub> , <i>bla</i> <sub>SHV-28</sub> , <i>bla</i> <sub>TEM-1A</sub> , <i>aac</i> (6')-Ib-cr, <i>oqx</i> A, <i>oqx</i> B, <i>fos</i> A6, <i>aac</i> (3)-IIa, <i>aac</i> (3')-Ib3, <i>aad</i> A1, <i>dfr</i> A14, <i>cat</i> B3, <i>tet</i> (D) | AMP, AMC, P/T, CTX, FEP, ERT, CIP, SXT, GM, TB, FF, TIG           | Imipenem                           |
| Kp_HUCA_Bac_17 | <i>bla</i> <sub>OXA-48</sub> , <i>bla</i> <sub>SHV-76</sub> , <i>oqx</i> A, <i>oqx</i> B, <i>qnr</i> B1, <i>fos</i> A, <i>dfr</i> A14                                                                                                                                                                                                                             | AMP, AMC, P/T, ERT, CIP, SXT, FF                                  | Piperacillin/Tazobactam            |
| Kp_HUCA_Bac_18 | <i>bla</i> <sub>CTX-M-15</sub> , <i>bla</i> <sub>OXA-1</sub> , <i>bla</i> <sub>OXA-48</sub> , <i>bla</i> <sub>OXA-9</sub> , <i>bla</i> <sub>SHV-28</sub> , <i>bla</i> <sub>TEM-1A</sub> , <i>oqx</i> A, <i>oqx</i> B, <i>fos</i> A6, <i>aac</i> (6')-Ib3, <i>aad</i> A1, <i>dfr</i> A14, <i>cat</i> B3, <i>tet</i> (D)                                            | AMP, AMC, P/T, FOX, CTX, FEP, ERT, IMP, MER, CIP, SXT, TB, FF     | Colistin                           |
| Kp_HUCA_Bac_19 | <i>bla</i> <sub>CTX-M-15</sub> , <i>bla</i> <sub>OXA-1</sub> , <i>bla</i> <sub>OXA-48</sub> , <i>bla</i> <sub>OXA-9</sub> , <i>bla</i> <sub>SHV-28</sub> , <i>bla</i> <sub>TEM-1A</sub> , <i>oqx</i> A, <i>oqx</i> B, <i>fos</i> A6, <i>aac</i> (3)-IIa, <i>aac</i> (6')-Ib3, <i>aad</i> A1, <i>dfr</i> A14, <i>cat</i> B3, <i>tet</i> (D)                        | AMP, AMC, P/T, CTX, FEP, ERT, CIP, SXT, GM, TB                    | Amikacin                           |
| Kp_HUCA_Bac_20 | <i>bla</i> <sub>OXA-48</sub> , <i>bla</i> <sub>SHV-1</sub> , <i>oqx</i> A, <i>oqx</i> B, <i>fos</i> A6, <i>tet</i> (D)                                                                                                                                                                                                                                            | AMP, AMC, P/T, ERT                                                | Ciprofloxacin                      |
| Kp_HUCA_Bac_21 | <i>bla</i> <sub>CTX-M-15</sub> , <i>bla</i> <sub>OXA-1</sub> , <i>bla</i> <sub>OXA-48</sub> , <i>bla</i> <sub>OXA-9</sub> , <i>bla</i> <sub>SHV-28</sub> , <i>bla</i> <sub>TEM-1A</sub> , <i>aac</i> (6')-Ib-cr, <i>oqx</i> A, <i>oqx</i> B, <i>fos</i> A6, <i>aac</i> (6')-Ib3, <i>aad</i> A1, <i>dfr</i> A14, <i>cat</i> B3, <i>tet</i> (D)                     | AMP, AMC, P/T, CTX, FEP, ERT, CIP, TB                             | Imipenem + Colistin                |

|                |                                                                                                                                                                                                                                                                                                                                                                                                                                                                                                              |                                                                     |                           |
|----------------|--------------------------------------------------------------------------------------------------------------------------------------------------------------------------------------------------------------------------------------------------------------------------------------------------------------------------------------------------------------------------------------------------------------------------------------------------------------------------------------------------------------|---------------------------------------------------------------------|---------------------------|
| Kp_HUCA_Bac_23 | <i>bla</i> <sub>OXA-48</sub> , <i>bla</i> <sub>SHV-12</sub> , <i>bla</i> <sub>TEM-1B</sub> , <i>oqx</i> <i>A</i> , <i>oqx</i> <i>B</i> ,<br><i>qnr</i> <i>B1</i> , <i>fos</i> <i>A</i> , <i>aac</i> (3)- <i>II</i> <i>d</i> , <i>aph</i> (3'')- <i>Ib</i> , <i>aph</i> (6)- <i>Id</i> ,<br><i>sul</i> 2, <i>dfr</i> <i>A14</i> , <i>cat</i> <i>A2</i> , <i>tet</i> ( <i>A</i> ), <i>tet</i> ( <i>D</i> )                                                                                                     | AMP, AMC, P/T, CTX,<br>FEP, ERT, CIP, SXT, GM                       | Amikacin + Colistin       |
| Kp_HUCA_Bac_24 | <i>bla</i> <sub>CTX-M-15</sub> , <i>bla</i> <sub>OXA-1</sub> , <i>bla</i> <sub>OXA-48</sub> , <i>bla</i> <sub>OXA-9</sub> , <i>bla</i> <sub>SHV-1</sub> ,<br><i>bla</i> <sub>TEM-1A</sub> , <i>aac</i> (6')- <i>Ib</i> - <i>cr</i> , <i>oqx</i> <i>A</i> , <i>oqx</i> <i>B</i> , <i>fos</i> <i>A6</i> ,<br><i>aac</i> (6')- <i>Ib</i> , <i>aac</i> (6')- <i>Ib</i> 3, <i>aad</i> <i>A1</i> , <i>dfr</i> <i>A14</i> , <i>cat</i> <i>B3</i> ,<br><i>tet</i> ( <i>D</i> )                                       | AMP, AMC, P/T, FOX,<br>CTX, FEP, ERT, IMP, MER,<br>CIP, SXT, TB, FF | Gentamicin + Colistin     |
| Kp_HUCA_Bac_28 | <i>bla</i> <sub>OXA-48</sub> , <i>bla</i> <sub>SHV-12</sub> , <i>bla</i> <sub>TEM-1B</sub> , <i>oqx</i> <i>A</i> , <i>oqx</i> <i>B</i> ,<br><i>qnr</i> <i>B1</i> , <i>fos</i> <i>A</i> , <i>aph</i> (3'')- <i>Ib</i> , <i>aph</i> (6)- <i>Id</i> , <i>sul</i> 2,<br><i>dfr</i> <i>A14</i> , <i>cat</i> <i>A2</i> , <i>tet</i> ( <i>D</i> )                                                                                                                                                                   | AMP, AMC, P/T, CTX,<br>FEP, ERT, CIP, SXT                           | Meropenem + Colistin      |
| Kp_HUCA_Bac_30 | <i>bla</i> <sub>OXA-48</sub> , <i>bla</i> <sub>SHV-12</sub> , <i>bla</i> <sub>TEM-1B</sub> , <i>oqx</i> <i>A</i> , <i>oqx</i> <i>B</i> ,<br><i>qnr</i> <i>B1</i> , <i>fos</i> <i>A</i> , <i>aph</i> (3'')- <i>Ib</i> , <i>aph</i> (6)- <i>Id</i> , <i>sul</i> 2,<br><i>dfr</i> <i>A14</i> , <i>cat</i> <i>A2</i> , <i>tet</i> ( <i>A</i> ), <i>tet</i> ( <i>D</i> )                                                                                                                                          | AMP, AMC, P/T, CTX,<br>FEP, ERT, CIP, SXT                           | Amikacin + Colistin       |
| Kp_HUCA_Bac_31 | <i>bla</i> <sub>CTX-M-15</sub> , <i>bla</i> <sub>OXA-1</sub> , <i>bla</i> <sub>OXA-48</sub> , <i>bla</i> <sub>OXA-9</sub> , <i>bla</i> <sub>SHV-28</sub> ,<br><i>bla</i> <sub>TEM-1A</sub> , <i>aac</i> (6')- <i>Ib</i> - <i>cr</i> , <i>oqx</i> <i>A</i> , <i>oqx</i> <i>B</i> , <i>fos</i> <i>A6</i> ,<br><i>aac</i> (3)- <i>II</i> <i>a</i> , <i>aac</i> (6')- <i>Ib</i> , <i>aac</i> (6')- <i>Ib</i> 3, <i>aad</i> <i>A1</i> ,<br><i>dfr</i> <i>A14</i> , <i>cat</i> <i>B3</i> , <i>tet</i> ( <i>D</i> ) | AMP, AMC, P/T, CTX,<br>FEP, ERT, CIP, SXT, GM,<br>TB, TIG           | Imipenem + Amikacin       |
| Kp_HUCA_Bac_33 | <i>bla</i> <sub>CTX-M-15</sub> , <i>bla</i> <sub>OXA-1</sub> , <i>bla</i> <sub>OXA-48</sub> , <i>bla</i> <sub>SHV-1</sub> ,<br><i>aac</i> (6')- <i>Ib</i> - <i>cr</i> , <i>oqx</i> <i>A</i> , <i>oqx</i> <i>B</i> , <i>fos</i> <i>A5</i> , <i>aad</i> <i>A2</i> ,<br><i>aph</i> (3')- <i>Ia</i> , <i>sul</i> 1, <i>mph</i> ( <i>A</i> ), <i>dfr</i> <i>A12</i> , <i>cat</i> <i>B3</i>                                                                                                                        | AMP, AMC, P/T, CTX,<br>FEP, ERT, CIP, SXT                           | Meropenem +<br>Gentamicin |
| Kp_HUCA_Bac_34 | <i>bla</i> <sub>CTX-M-15</sub> , <i>bla</i> <sub>OXA-1</sub> , <i>bla</i> <sub>OXA-48</sub> , <i>bla</i> <sub>SHV-76</sub> ,<br><i>bla</i> <sub>TEM-1B</sub> , <i>aac</i> (6')- <i>Ib</i> - <i>cr</i> , <i>oqx</i> <i>A</i> , <i>oqx</i> <i>B</i> , <i>qnr</i> <i>B1</i> ,<br><i>fos</i> <i>A</i> , <i>aac</i> (3)- <i>II</i> <i>a</i> , <i>aph</i> (3'')- <i>Ib</i> , <i>aph</i> (6)- <i>Id</i> , <i>sul</i> 2,<br><i>dfr</i> <i>A14</i> , <i>cat</i> <i>B3</i> , <i>tet</i> ( <i>A</i> )                   | AMP, AMC, P/T, CTX,<br>FEP, ERT, CIP, SXT, GM,<br>TB                | Colistin + Amikacin       |
| Kp_HUCA_Bac_35 | <i>bla</i> <sub>CTX-M-15</sub> , <i>bla</i> <sub>OXA-1</sub> , <i>bla</i> <sub>OXA-48</sub> , <i>bla</i> <sub>SHV-76</sub> ,<br><i>bla</i> <sub>TEM-1B</sub> , <i>aac</i> (6')- <i>Ib</i> - <i>cr</i> , <i>oqx</i> <i>A</i> , <i>oqx</i> <i>B</i> , <i>qnr</i> <i>B1</i> ,<br><i>fos</i> <i>A</i> , <i>aac</i> (3)- <i>II</i> <i>a</i> , <i>aph</i> (3'')- <i>Ib</i> , <i>aph</i> (6)- <i>Id</i> , <i>sul</i> 2,<br><i>dfr</i> <i>A14</i> , <i>cat</i> <i>B3</i> , <i>tet</i> ( <i>A</i> )                   | AMP, AMC, P/T, CTX,<br>FEP, ERT, CIP, SXT, GM,<br>TB                | Meropenem + Colistin      |
| Kp_HUCA_Bac_36 | <i>bla</i> <sub>CTX-M-15</sub> , <i>bla</i> <sub>OXA-1</sub> , <i>bla</i> <sub>OXA-48</sub> , <i>bla</i> <sub>SHV-76</sub> ,<br><i>bla</i> <sub>TEM-1B</sub> , <i>aac</i> (6')- <i>Ib</i> - <i>cr</i> , <i>oqx</i> <i>A</i> , <i>oqx</i> <i>B</i> , <i>qnr</i> <i>B1</i> ,<br><i>fos</i> <i>A</i> , <i>aac</i> (3)- <i>II</i> <i>a</i> , <i>aph</i> (3'')- <i>Ib</i> , <i>aph</i> (6)- <i>Id</i> , <i>sul</i> 2,<br><i>dfr</i> <i>A14</i> , <i>cat</i> <i>B3</i> , <i>tet</i> ( <i>A</i> )                   | AMP, AMC, P/T, CTX,<br>FEP, ERT, CIP, SXT, GM,<br>TB                | Colistin + Amikacin       |
| Kp_HUCA_Bac_37 | <i>bla</i> <sub>OXA-48</sub> , <i>bla</i> <sub>SHV-28</sub> , <i>oqx</i> <i>A</i> , <i>oqx</i> <i>B</i> , <i>fos</i> <i>A6</i>                                                                                                                                                                                                                                                                                                                                                                               | AMP, AMC, P/T, ERT, CIP                                             | Cefotaxime                |
| Kp_HUCA_Bac_38 | <i>bla</i> <sub>OXA-48</sub> , <i>bla</i> <sub>SHV-1</sub> , <i>oqx</i> <i>A</i> , <i>oqx</i> <i>B</i> , <i>fos</i> <i>A5</i>                                                                                                                                                                                                                                                                                                                                                                                | AMP, AMC, P/T, ERT, CIP                                             | Meropenem                 |
| Kp_HUCA_Bac_39 | <i>bla</i> <sub>CTX-M-15</sub> , <i>bla</i> <sub>OXA-1</sub> , <i>bla</i> <sub>OXA-48</sub> , <i>bla</i> <sub>SHV-76</sub> ,<br><i>bla</i> <sub>TEM-1B</sub> , <i>aac</i> (6')- <i>Ib</i> - <i>cr</i> , <i>oqx</i> <i>A</i> , <i>oqx</i> <i>B</i> , <i>qnr</i> <i>B1</i> ,<br><i>fos</i> <i>A</i> , <i>aac</i> (3)- <i>II</i> <i>a</i> , <i>aph</i> (3'')- <i>Ib</i> , <i>aph</i> (6)- <i>Id</i> , <i>sul</i> 2,<br><i>dfr</i> <i>A14</i> , <i>cat</i> <i>B3</i> , <i>tet</i> ( <i>A</i> )                   | AMP, AMC, P/T, CTX,<br>FEP, ERT, CIP, SXT, GM,<br>TB                | Colistin + Amikacin       |
| Kp_HUCA_Bac_42 | <i>bla</i> <sub>OXA-48</sub> , <i>bla</i> <sub>SHV-1</sub> , <i>oqx</i> <i>A</i> , <i>oqx</i> <i>B</i> , <i>fos</i> <i>A5</i>                                                                                                                                                                                                                                                                                                                                                                                | AMP, AMC, P/T, ERT, CIP                                             | Amikacin                  |
| Kp_HUCA_Bac_43 | <i>bla</i> <sub>OXA-48</sub> , <i>bla</i> <sub>SHV-12</sub> , <i>bla</i> <sub>TEM-1B</sub> , <i>oqx</i> <i>A</i> , <i>oqx</i> <i>B</i> ,<br><i>qnr</i> <i>B1</i> , <i>fos</i> <i>A</i> , <i>aac</i> (3)- <i>II</i> <i>d</i> , <i>aph</i> (3'')- <i>Ib</i> , <i>aph</i> (6)- <i>Id</i> ,<br><i>sul</i> 2, <i>dfr</i> <i>A14</i> , <i>cat</i> <i>A2</i> , <i>tet</i> ( <i>A</i> ), <i>tet</i> ( <i>D</i> )                                                                                                     | AMP, AMC, P/T, CTX,<br>FEP, ERT, CIP, SXT, GM                       | Imipenem + Colistin       |

|                |                                                                                                                                                                                                                                                                                                                  |                                                           |                      |
|----------------|------------------------------------------------------------------------------------------------------------------------------------------------------------------------------------------------------------------------------------------------------------------------------------------------------------------|-----------------------------------------------------------|----------------------|
| Kp_HUCA_Bac_44 | <i>bla</i> CTX-M-15, <i>bla</i> OXA-1, <i>bla</i> OXA-48, <i>bla</i> SHV-76,<br><i>bla</i> TEM-1B, <i>aac</i> (6')-Ib-cr, <i>oqx</i> A, <i>oqx</i> B, <i>qnr</i> B1,<br><i>fos</i> A, <i>aac</i> (3)-IIa, <i>aph</i> (3'')-Ib, <i>aph</i> (6)-Id, <i>sul</i> 2,<br><i>dfr</i> A14, <i>cat</i> B3, <i>tet</i> (A) | AMP, AMC, P/T, CTX,<br>FEP, ERT, CIP, SXT, GM,<br>TB      | Meropenem            |
| Kp_HUCA_Bac_45 | <i>bla</i> CTX-M-15, <i>bla</i> OXA-1, <i>bla</i> OXA-48, <i>bla</i> SHV-76,<br><i>bla</i> TEM-1B, <i>aac</i> (6')-Ib-cr, <i>oqx</i> A, <i>oqx</i> B, <i>fos</i> A,<br><i>aac</i> (3)-IIa, <i>aph</i> (3'')-Ib, <i>aph</i> (6)-Id, <i>sul</i> 2,<br><i>dfr</i> A14, <i>cat</i> B3                                | AMP, AMC, P/T, CTX,<br>FEP, ERT, SXT, GM, TB              | Meropenem + Amikacin |
| Kp_HUCA_Bac_46 | <i>bla</i> CTX-M-15, <i>bla</i> OXA-1, <i>bla</i> OXA-48, <i>bla</i> SHV-1,<br><i>aac</i> (6')-Ib-cr, <i>oqx</i> A, <i>oqx</i> B, <i>fos</i> A5, <i>aad</i> A2,<br><i>aph</i> (3')-Ia, <i>sul</i> 1, <i>mph</i> (A), <i>dfr</i> A12, <i>cat</i> B3                                                               | AMP, AMC, P/T, CTX,<br>FEP, ERT, CIP, SXT                 | Amikacin + Colistin  |
| Kp_HUCA_Bac_47 | <i>bla</i> CTX-M-15, <i>bla</i> OXA-1, <i>bla</i> OXA-48, <i>bla</i> SHV-76,<br><i>aac</i> (6')-Ib-cr, <i>oqx</i> A, <i>oqx</i> B, <i>fos</i> A, <i>aac</i> (3)-IIa,<br><i>dfr</i> A14, <i>cat</i> B3                                                                                                            | AMP, AMC, P/T, CTX,<br>FEP, ERT, CIP, SXT, GM,<br>TB      | Meropenem + Colistin |
| Kp_HUCA_Bac_48 | <i>bla</i> CTX-M-15, <i>bla</i> OXA-1, <i>bla</i> OXA-48, <i>bla</i> OXA-9, <i>bla</i> SHV-28,<br><i>bla</i> TEM-1A, <i>aac</i> (6')-Ib-cr, <i>oqx</i> A, <i>oqx</i> B, <i>fos</i> A6,<br><i>aac</i> (3)-IIa, <i>aac</i> (6')-Ib, <i>aad</i> A1, <i>dfr</i> A14, <i>cat</i> B3,<br><i>tet</i> (D)                | AMP, AMC, P/T, CTX,<br>FEP, ERT, CIP, SXT, GM,<br>TB      | Meropenem + Amikacin |
| Kp_HUCA_Bac_49 | <i>bla</i> OXA-48, <i>bla</i> SHV-12, <i>bla</i> TEM-1B, <i>oqx</i> A, <i>oqx</i> B,<br><i>qnr</i> B1, <i>fos</i> A, <i>aac</i> (3)-IId, <i>aph</i> (3'')-Ib, <i>aph</i> (6)-Id,<br><i>sul</i> 2, <i>dfr</i> A14, <i>cat</i> A2, <i>tet</i> (A), <i>tet</i> (D)                                                  | AMP, AMC, P/T, CTX,<br>FEP, ERT, CIP, SXT, GM,<br>TB, TIG | Meropenem + Amikacin |
| Kp_HUCA_Bac_50 | <i>bla</i> OXA-48, <i>bla</i> SHV-28, <i>oqx</i> A, <i>oqx</i> B, <i>fos</i> A6                                                                                                                                                                                                                                  | AMP, AMC, P/T, ERT,<br>CIP, FF                            | Gentamicin           |
| Kp_HUCA_Bac_51 | <i>bla</i> CTX-M-15, <i>bla</i> OXA-1, <i>bla</i> OXA-48, <i>bla</i> OXA-9, <i>bla</i> SHV-28,<br><i>bla</i> TEM-1A, <i>aac</i> (6')-Ib-cr, <i>oqx</i> A, <i>oqx</i> B, <i>fos</i> A6,<br><i>aac</i> (3)-IIa, <i>aac</i> (6')-Ib, <i>aad</i> A1, <i>dfr</i> A14, <i>cat</i> B3                                   | AMP, AMC, P/T, CTX,<br>FEP, ERT, CIP, SXT, GM,<br>TB, AK  | Colistin             |
| Kp_HUCA_Bac_52 | <i>bla</i> OXA-48, <i>bla</i> SHV-12, <i>bla</i> TEM-1B, <i>oqx</i> A, <i>oqx</i> B,<br><i>qnr</i> B1, <i>fos</i> A, <i>aac</i> (3)-IId, <i>aph</i> (3'')-Ib, <i>aph</i> (6)-Id,<br><i>sul</i> 2, <i>dfr</i> A14, <i>cat</i> A2, <i>tet</i> (A), <i>tet</i> (D)                                                  | AMP, AMC, P/T, CTX,<br>FEP, ERT, CIP, SXT, GM             | Amikacin             |
| Kp_HUCA_Bac_53 | <i>bla</i> CTX-M-15, <i>bla</i> OXA-1, <i>bla</i> OXA-48, <i>bla</i> OXA-9, <i>bla</i> SHV-28,<br><i>bla</i> TEM-1A, <i>oqx</i> A, <i>oqx</i> B, <i>fos</i> A6, <i>aac</i> (3)-IIa,<br><i>aac</i> (6')-Ib3, <i>aad</i> A1, <i>dfr</i> A14, <i>cat</i> B3, <i>tet</i> (D)                                         | AMP, AMC, P/T, CTX,<br>FEP, ERT, CIP, SXT, GM,<br>TB      | Meropenem + Colistin |
| Kp_HUCA_Bac_54 | <i>bla</i> CTX-M-15, <i>bla</i> OXA-1, <i>bla</i> OXA-48, <i>bla</i> OXA-9, <i>bla</i> SHV-28,<br><i>bla</i> TEM-1A, <i>oqx</i> A, <i>oqx</i> B, <i>fos</i> A6, <i>aac</i> (3)-IIa,<br><i>aac</i> (6')-Ib3, <i>aad</i> A1, <i>dfr</i> A14, <i>cat</i> B3                                                         | AMP, AMC, P/T, FOX,<br>CTX, FEP, ERT, CIP, SXT,<br>GM, TB | Meropenem + Colistin |
| Kp_HUCA_Bac_56 | <i>bla</i> CTX-M-15, <i>bla</i> OXA-1, <i>bla</i> OXA-48, <i>bla</i> SHV-76,<br><i>bla</i> TEM-1B, <i>aac</i> (6')-Ib-cr, <i>oqx</i> A, <i>oqx</i> B, <i>qnr</i> B1,<br><i>fos</i> A, <i>aac</i> (3)-IIa, <i>aph</i> (3'')-Ib, <i>aph</i> (6)-Id, <i>sul</i> 2,<br><i>dfr</i> A14, <i>cat</i> B3, <i>tet</i> (A) | AMP, AMC, P/T, CTX,<br>FEP, ERT, CIP, SXT, GM,<br>TB,     | Meropenem + Amikacin |
| Kp_HUCA_Bac_57 | <i>bla</i> OXA-48, <i>oqx</i> A, <i>oqx</i> B, <i>fos</i> A6, <i>fos</i> A7                                                                                                                                                                                                                                      | AMP, AMC, P/T, ERT                                        | Ceftazidime          |
| Kp_HUCA_Bac_59 | <i>bla</i> OXA-48, <i>bla</i> TEM-1A, <i>bla</i> LEN-12, <i>oqx</i> A, <i>oqx</i> B, <i>fos</i> A                                                                                                                                                                                                                | AMP, AMC, P/T, ERT                                        | Ciprofloxacin        |
| Kp_HUCA_Bac_60 | <i>bla</i> CTX-M-15, <i>bla</i> OXA-1, <i>bla</i> OXA-48, <i>bla</i> OXA-9, <i>bla</i> SHV-28,                                                                                                                                                                                                                   | AMP, AMC, P/T, CTX,                                       | Meropenem + Colistin |

|                |                                                                                                                                                                                                                                                                                                                                                                                                            |                                                          |                                     |
|----------------|------------------------------------------------------------------------------------------------------------------------------------------------------------------------------------------------------------------------------------------------------------------------------------------------------------------------------------------------------------------------------------------------------------|----------------------------------------------------------|-------------------------------------|
|                | <i>bla</i> <sub>TEM-1A</sub> , <i>oqx</i> A, <i>oqx</i> B, <i>fos</i> A6, <i>aac</i> (3)-IIa, <i>aac</i> (6')-Ib3, <i>aad</i> A1, <i>dfr</i> A14, <i>cat</i> B3, <i>tet</i> (D)                                                                                                                                                                                                                            | FEP, ERT, CIP, SXT, GM, TB                               |                                     |
| Kp_HUCA_Bac_62 | <i>bla</i> <sub>CTX-M-15</sub> , <i>bla</i> <sub>OXA-1</sub> , <i>bla</i> <sub>OXA-48</sub> , <i>bla</i> <sub>SHV-76</sub> , <i>bla</i> <sub>TEM-1B</sub> , <i>aac</i> (6')-Ib-cr, <i>oqx</i> A, <i>oqx</i> B, <i>qnr</i> B1, <i>fos</i> A, <i>aac</i> (3)-IIa, <i>aph</i> (3'')-Ib, <i>aph</i> (6)-Id, <i>sul</i> 2, <i>dfr</i> A14, <i>cat</i> B3, <i>tet</i> (A)                                        | AMP, AMC, P/T, CTX, FEP, ERT, CIP, SXT, GM, TB           | Piperacillin/Tazobactam             |
| Kp_HUCA_Bac_63 | <i>bla</i> <sub>OXA-48</sub> , <i>bla</i> <sub>SHV-12</sub> , <i>bla</i> <sub>TEM-1B</sub> , <i>oqx</i> A, <i>oqx</i> B, <i>qnr</i> B1, <i>fos</i> A, <i>aac</i> (3)-IId, <i>aph</i> (3'')-Ib, <i>aph</i> (6)-Id, <i>sul</i> 2, <i>dfr</i> A14, <i>cat</i> A2, <i>tet</i> (A), <i>tet</i> (D)                                                                                                              | AMP, AMC, P/T, CTX, FEP, ERT, CIP, SXT, GM               | Imipenem + Tobramycin               |
| Kp_HUCA_Bac_64 | <i>bla</i> <sub>CTX-M-15</sub> , <i>bla</i> <sub>OXA-1</sub> , <i>bla</i> <sub>OXA-48</sub> , <i>bla</i> <sub>SHV-1</sub> , <i>aac</i> (6')-Ib-cr, <i>oqx</i> A, <i>oqx</i> B, <i>fos</i> A5, <i>aad</i> A2, <i>aph</i> (3')-Ia, <i>sul</i> 1, <i>mph</i> (A), <i>dfr</i> A12, <i>cat</i> B3                                                                                                               | AMP, AMC, P/T, CTX, FEP, ERT, IMP, MER, CIP, SXT         | Gentamicin + Colistin + Tigecycline |
| Kp_HUCA_Bac_65 | <i>bla</i> <sub>OXA-48</sub> , <i>bla</i> <sub>SHV-12</sub> , <i>bla</i> <sub>TEM-1B</sub> , <i>oqx</i> A, <i>oqx</i> B, <i>qnr</i> B1, <i>qnr</i> S1, <i>fos</i> A, <i>aac</i> (3)-IId, <i>aph</i> (3'')-Ib, <i>aph</i> (6)-Id, <i>sul</i> 2, <i>dfr</i> A14, <i>cat</i> A2, <i>tet</i> (A), <i>tet</i> (D)                                                                                               | AMP, AMC, P/T, CTX, FEP, ERT, IMP, MER, CIP, SXT, GM, FF | Meropenem + Amikacin                |
| Kp_HUCA_Bac_66 | <i>bla</i> <sub>OXA-48</sub> , <i>bla</i> <sub>SHV-12</sub> , <i>bla</i> <sub>TEM-1B</sub> , <i>oqx</i> A, <i>oqx</i> B, <i>qnr</i> B1, <i>qnr</i> S1, <i>fos</i> A, <i>aac</i> (3)-IId, <i>aph</i> (3'')-Ib, <i>aph</i> (6)-Id, <i>sul</i> 2, <i>dfr</i> A14, <i>cat</i> A2, <i>tet</i> (D)                                                                                                               | AMP, AMC, P/T, CTX, FEP, ERT, CIP, SXT, GM               | Meropenem + Amikacin                |
| Kp_HUCA_Bac_67 | <i>bla</i> <sub>OXA-48</sub> , <i>bla</i> <sub>SHV-12</sub> , <i>bla</i> <sub>TEM-1B</sub> , <i>oqx</i> A, <i>oqx</i> B, <i>qnr</i> B1, <i>qnr</i> S1, <i>fos</i> A, <i>aac</i> (3)-IId, <i>aph</i> (3'')-Ib, <i>aph</i> (6)-Id, <i>sul</i> 2, <i>dfr</i> A14, <i>cat</i> A2, <i>tet</i> (A), <i>tet</i> (D)                                                                                               | AMP, AMC, P/T, CTX, FEP, ERT, CIP, SXT, GM               | Amikacin + Colistin                 |
| Kp_HUCA_Bac_68 | <i>bla</i> <sub>OXA-48</sub> , <i>bla</i> <sub>SHV-27</sub> , <i>oqx</i> A, <i>oqx</i> B, <i>fos</i> A6                                                                                                                                                                                                                                                                                                    | AMP, AMC, P/T, ERT                                       | Cefotaxime + Ciprofloxacin          |
| Kp_HUCA_Bac_69 | <i>bla</i> <sub>CTX-M-15</sub> , <i>bla</i> <sub>OXA-1</sub> , <i>bla</i> <sub>OXA-48</sub> , <i>bla</i> <sub>OXA-9</sub> , <i>bla</i> <sub>SHV-28</sub> , <i>bla</i> <sub>TEM-1A</sub> , <i>aac</i> (6')-Ib-cr, <i>oqx</i> A, <i>oqx</i> B, <i>fos</i> A6, <i>aac</i> (3)-IIa, <i>aac</i> (6')-Ib3, <i>aad</i> A1, <i>dfr</i> A14, <i>cat</i> B3                                                          | AMP, AMC, P/T, CTX, FEP, ERT, CIP, GM, TB                | Meropenem + Colistin + Amikacin     |
| Kp_HUCA_Bac_71 | <i>bla</i> <sub>OXA-48</sub> , <i>bla</i> <sub>SHV-12</sub> , <i>bla</i> <sub>TEM-1B</sub> , <i>oqx</i> A, <i>oqx</i> B, <i>qnr</i> B1, <i>fos</i> A, <i>aac</i> (3)-IId, <i>aph</i> (3'')-Ib, <i>aph</i> (6)-Id, <i>sul</i> 2, <i>dfr</i> A14, <i>cat</i> A2, <i>tet</i> (A), <i>tet</i> (D)                                                                                                              | AMP, AMC, P/T, CTX, FEP, ERT, CIP, SXT, GM, TIG          | Meropenem + Amikacin + Colistin     |
| Kp_HUCA_Bac_72 | <i>bla</i> <sub>CTX-M-15</sub> , <i>bla</i> <sub>OXA-1</sub> , <i>bla</i> <sub>OXA-48</sub> , <i>bla</i> <sub>SHV-28</sub> , <i>bla</i> <sub>TEM-1B</sub> , <i>aac</i> (6')-Ib-cr, <i>oqx</i> A, <i>oqx</i> B, <i>qnr</i> B1, <i>fos</i> A6, <i>aph</i> (3'')-Ib, <i>aph</i> (6)-Id, <i>aph</i> (3')-Ia, <i>aph</i> (4)-Ia, <i>aac</i> (3)-IV, <i>sul</i> 2, <i>dfr</i> A14, <i>cat</i> B3, <i>tet</i> (A) | AMP, AMC, P/T, CTX, FEP, ERT, CIP, SXT, TB, FF, TIG      | Meropenem + Amikacin                |
| Kp_HUCA_Bac_73 | <i>bla</i> <sub>OXA-1</sub> , <i>bla</i> <sub>OXA-48</sub> , <i>bla</i> <sub>SHV-28</sub> , <i>bla</i> <sub>TEM-1C</sub> , <i>aac</i> (6')-Ib-cr, <i>oqx</i> A, <i>oqx</i> B, <i>fos</i> A6, <i>aac</i> (3)-IId, <i>cat</i> B3                                                                                                                                                                             | AMP, AMC, P/T, ERT, CIP, GM, TB, CST                     | Ceftazidime                         |
| Kp_HUCA_Bac_74 | <i>bla</i> <sub>CTX-M-15</sub> , <i>bla</i> <sub>OXA-1</sub> , <i>bla</i> <sub>OXA-48</sub> , <i>bla</i> <sub>SHV-76</sub> , <i>bla</i> <sub>TEM-1B</sub> , <i>aac</i> (6')-Ib-cr, <i>oqx</i> A, <i>oqx</i> B, <i>qnr</i> B1, <i>fos</i> A, <i>aac</i> (3)-IIa, <i>aph</i> (3'')-Ib, <i>aph</i> (6)-Id, <i>sul</i> 2, <i>dfr</i> A14, <i>cat</i> B3, <i>tet</i> (A)                                        | AMP, AMC, P/T, CTX, FEP, ERT, CIP, SXT, GM, TB,          | Amikacin                            |
| Kp_HUCA_Bac_75 | <i>bla</i> <sub>CTX-M-15</sub> , <i>bla</i> <sub>OXA-1</sub> , <i>bla</i> <sub>OXA-48</sub> , <i>bla</i> <sub>SHV-28</sub> ,                                                                                                                                                                                                                                                                               | AMP, AMC, P/T, CTX,                                      | Meropenem +                         |

|                |                                                                                                                                                                                                                                                                                                                                                                     |                                                                   |                                    |
|----------------|---------------------------------------------------------------------------------------------------------------------------------------------------------------------------------------------------------------------------------------------------------------------------------------------------------------------------------------------------------------------|-------------------------------------------------------------------|------------------------------------|
|                | <i>bla</i> <sub>TEM-1B</sub> , <i>aac</i> (6')-Ib-cr, <i>oqx</i> A, <i>oqx</i> B, <i>qnr</i> B1, <i>fos</i> A6, <i>aph</i> (3'')-Ib, <i>aph</i> (6)-Id, <i>sul</i> 2, <i>dfr</i> A14, <i>cat</i> B3, <i>tet</i> (A)                                                                                                                                                 | FEP, ERT, CIP, SXT, TB, FF, CST                                   | Tigecycline + Colistin             |
| Kp_HUCA_Bac_76 | <i>bla</i> <sub>CTX-M-15</sub> , <i>bla</i> <sub>OXA-1</sub> , <i>bla</i> <sub>OXA-48</sub> , <i>bla</i> <sub>SHV-76</sub> , <i>bla</i> <sub>TEM-1B</sub> , <i>aac</i> (6')-Ib-cr, <i>oqx</i> A, <i>oqx</i> B, <i>qnr</i> B1, <i>fos</i> A, <i>aac</i> (3)-IIa, <i>aph</i> (3'')-Ib, <i>aph</i> (6)-Id, <i>sul</i> 2, <i>dfr</i> A14, <i>cat</i> B3, <i>tet</i> (A) | AMP, AMC, P/T, FOX, CTX, FEP, ERT, IMP, MER, CIP, SXT, GM, TB, FF | Meropenem                          |
| Kp_HUCA_Bac_78 | <i>bla</i> <sub>OXA-48</sub> , <i>bla</i> <sub>SHV-12</sub> , <i>bla</i> <sub>TEM-1B</sub> , <i>oqx</i> A, <i>oqx</i> B, <i>qnr</i> B1, <i>fos</i> A, <i>aac</i> (3)-IIa, <i>aph</i> (3'')-Ib, <i>aph</i> (6)-Id, <i>sul</i> 2, <i>dfr</i> A14, <i>cat</i> A2, <i>tet</i> (A), <i>tet</i> (D)                                                                       | AMP, AMC, P/T, CTX, FEP, ERT, IMP, CIP, SXT, GM                   | Meropenem + Colistin               |
| Kp_HUCA_Bac_79 | <i>bla</i> <sub>OXA-48</sub> , <i>bla</i> <sub>SHV-12</sub> , <i>bla</i> <sub>TEM-1B</sub> , <i>oqx</i> A, <i>oqx</i> B, <i>qnr</i> B1, <i>fos</i> A, <i>aac</i> (3)-IIa, <i>aph</i> (3'')-Ib, <i>aph</i> (6)-Id, <i>sul</i> 2, <i>dfr</i> A14, <i>cat</i> A2, <i>tet</i> (A), <i>tet</i> (D)                                                                       | AMP, AMC, P/T, CTX, FEP, ERT, CIP, SXT, GM                        | Imipenem + Colistin                |
| Kp_HUCA_Bac_80 | <i>bla</i> <sub>CTX-M-15</sub> , <i>bla</i> <sub>OXA-1</sub> , <i>bla</i> <sub>OXA-48</sub> , <i>bla</i> <sub>OXA-9</sub> , <i>bla</i> <sub>SHV-28</sub> , <i>bla</i> <sub>TEM-1A</sub> , <i>aac</i> (6')-Ib-cr, <i>oqx</i> A, <i>oqx</i> B, <i>fos</i> A6, <i>aac</i> (6')-Ib3, <i>aad</i> A1, <i>dfr</i> A14, <i>cat</i> B3                                       | AMP, AMC, P/T, CTX, FEP, ERT, CIP, TB, FF                         | Meropenem                          |
| Kp_HUCA_Bac_81 | <i>bla</i> <sub>CTX-M-15</sub> , <i>bla</i> <sub>OXA-1</sub> , <i>bla</i> <sub>OXA-48</sub> , <i>bla</i> <sub>SHV-28</sub> , <i>bla</i> <sub>TEM-1B</sub> , <i>aac</i> (6')-Ib-cr, <i>oqx</i> A, <i>oqx</i> B, <i>qnr</i> B1, <i>fos</i> A6, <i>aph</i> (3'')-Ib, <i>aph</i> (6)-Id, <i>sul</i> 2, <i>dfr</i> A14, <i>cat</i> B3, <i>tet</i> (A)                    | AMP, AMC, P/T, CTX, FEP, ERT, CIP, SXT, FF, CST                   | Meropenem + Colistin               |
| Kp_HUCA_Bac_82 | <i>bla</i> <sub>OXA-48</sub> , <i>oqx</i> A, <i>oqx</i> B, <i>fos</i> A, <i>aad</i> A2b, <i>sul</i> 1, <i>tet</i> (A)                                                                                                                                                                                                                                               | AMP, AMC, P/T, ERT, CIP                                           | Cefotaxime + Amikacin + Colistin   |
| Kp_HUCA_Bac_83 | <i>bla</i> <sub>OXA-48</sub> , <i>bla</i> <sub>SHV-12</sub> , <i>bla</i> <sub>TEM-1B</sub> , <i>oqx</i> A, <i>oqx</i> B, <i>qnr</i> B1, <i>fos</i> A, <i>aph</i> (3'')-Ib, <i>aph</i> (6)-Id, <i>sul</i> 2, <i>dfr</i> A14, <i>cat</i> A2, <i>tet</i> (A), <i>tet</i> (D)                                                                                           | AMP, AMC, P/T, CTX, FEP, ERT, CIP, SXT                            | Meropenem + Amikacin + Tigecycline |
| Kp_HUCA_Bac_84 | <i>bla</i> <sub>OXA-48</sub> , <i>bla</i> <sub>SHV-11</sub> , <i>oqx</i> A, <i>oqx</i> B, <i>fos</i> A6                                                                                                                                                                                                                                                             | AMP, AMC, P/T, ERT                                                | Ciprofloxacin                      |
| Kp_HUCA_Bac_85 | <i>bla</i> <sub>OXA-48</sub> , <i>bla</i> <sub>TEM-135</sub> , <i>oqx</i> A, <i>oqx</i> B, <i>qnr</i> S1, <i>fos</i> A, <i>dfr</i> A14                                                                                                                                                                                                                              | AMP, AMC, P/T, FOX, CTX, FEP, ERT, IMP, MER, CIP, SXT, FF         | Tigecycline + Colistin             |
| Kp_HUCA_Bac_88 | <i>bla</i> <sub>OXA-48</sub> , <i>bla</i> <sub>SHV-76</sub> , <i>oqx</i> A, <i>oqx</i> B, <i>qnr</i> B1, <i>fos</i> A, <i>dfr</i> A14                                                                                                                                                                                                                               | AMP, AMC, P/T, ERT, IMP, MER, SXT, FF                             | Cefepime + Amikacin                |
| Kp_HUCA_Bac_89 | <i>bla</i> <sub>OXA-48</sub> , <i>bla</i> <sub>SHV-12</sub> , <i>bla</i> <sub>TEM-1B</sub> , <i>oqx</i> A, <i>oqx</i> B, <i>qnr</i> B1, <i>fos</i> A, <i>aac</i> (3)-IIa, <i>aph</i> (3'')-Ib, <i>aph</i> (6)-Id, <i>sul</i> 2, <i>dfr</i> A14, <i>cat</i> A2, <i>tet</i> (A), <i>tet</i> (D)                                                                       | AMP, AMC, P/T, CTX, FEP, ERT, CIP, SXT, GM                        | Tobramycin                         |
| Kp_HUCA_Bac_90 | <i>bla</i> <sub>CTX-M-15</sub> , <i>bla</i> <sub>OXA-1</sub> , <i>bla</i> <sub>OXA-48</sub> , <i>bla</i> <sub>SHV-1</sub> , <i>bla</i> <sub>TEM-1A</sub> , <i>aac</i> (6')-Ib-cr, <i>oqx</i> A, <i>oqx</i> B, <i>fos</i> A, <i>aac</i> (3)-IIa, <i>dfr</i> A14, <i>cat</i> B3, <i>tet</i> (D)                                                                       | AMP, AMC, P/T, FOX, CTX, FEP, ERT, IMP, MER, CIP, GM, TB, CST     | Colistin + Amikacin                |
| Kp_HUCA_Bac_92 | <i>bla</i> <sub>OXA-48</sub> , <i>bla</i> <sub>SHV-12</sub> , <i>bla</i> <sub>TEM-1B</sub> , <i>oqx</i> A, <i>oqx</i> B, <i>qnr</i> B1, <i>fos</i> A, <i>aac</i> (3)-IIa, <i>aph</i> (3'')-Ib, <i>aph</i> (6)-Id, <i>sul</i> 2, <i>dfr</i> A14, <i>cat</i> A2, <i>tet</i> (D)                                                                                       | AMP, AMC, P/T, FOX, CTX, FEP, ERT, IMP, CIP, SXT, GM              | Meropenem + Amikacin               |
| Kp_HUCA_Bac_93 | <i>bla</i> <sub>CTX-M-15</sub> , <i>bla</i> <sub>OXA-1</sub> , <i>bla</i> <sub>OXA-48</sub> , <i>bla</i> <sub>SHV-28</sub> , <i>bla</i> <sub>TEM-1B</sub> , <i>aac</i> (6')-Ib-cr, <i>oqx</i> A, <i>oqx</i> B, <i>qnr</i> S1,                                                                                                                                       | AMP, AMC, P/T, CTX, FEP, ERT, CIP, SXT, GM,                       | Amikacin                           |

|                |                                                                                                                                                                          |                                            |                      |
|----------------|--------------------------------------------------------------------------------------------------------------------------------------------------------------------------|--------------------------------------------|----------------------|
|                | <i>fosA6, aac(3)-IIa, aph(3'')-Ib, aph(6)-Id, sul2, dfrA14, catB3</i>                                                                                                    | TB, CST                                    |                      |
| Kp_HUCA_Bac_94 | <i>bla<sub>OXA-48</sub>, bla<sub>SHV-12</sub>, bla<sub>TEM-1B</sub>, oqxA, oqxB, qnrB1, fosA, aac(3)-IIa, aph(3'')-Ib, aph(6)-Id, sul2, dfrA14, tet(D)</i>               | AMP, AMC, P/T, CTX, FEP, ERT, CIP, SXT, GM | Meropenem + Amikacin |
| Kp_HUCA_Bac_95 | <i>bla<sub>OXA-48</sub>, bla<sub>SHV-12</sub>, bla<sub>TEM-1B</sub>, oqxA, oqxB, qnrB1, qnrS1, fosA, aac(3)-IIa, aph(3'')-Ib, aph(6)-Id, sul2, dfrA14, catA2, tet(D)</i> | AMP, AMC, P/T, CTX, FEP, ERT, CIP, SXT, GM | Meropenem + Amikacin |

ND, not detected; AMP, ampicillin; AMC, amoxicillin/clavulanic acid; P/T, piperacillin/tazobactam; FOX, ceftiofur; CTX, cefotaxime; FEP, cefepime; ERT, ertapenem; IMP, imipenem; MER, meropenem; CIP, ciprofloxacin; SXT, trimethoprim-sulphamethoxazole; GM, gentamicin; TB, tobramycin; AK, amikacin; FF, fosfomycin; TIG, tigecycline; CST, colistin.
